# Supplementary material for: Assessing and enhancing migration of human myogenic progenitors using directed iPS cell differentiation and advanced tissue modelling
Source: PubMed Central journal article supplement (PMC9549733; doi:10.15252/emmm.202114526), 2022-09-26
Supplement: EMMM-14-e14526-s003.pdf [file EMMM-14-e14526-s003.pdf]

## APPENDIX

### Assessing and enhancing migration of human myogenic progenitors using directed iPSC cell differentiation and advanced tissue modelling

SungWoo Choi<sup>1,2,#</sup>, Giulia Ferrari<sup>2,#</sup>, Louise A. Moyle<sup>2,§</sup>, Kirsty Mackinlay<sup>2,∅</sup>, Naira Naouar<sup>3</sup>, Salma Jalal<sup>2</sup>, Sara Benedetti<sup>4,5</sup>, Christine Wells<sup>6</sup>, Francesco Muntoni<sup>5,7</sup>, Francesco Saverio Tedesco<sup>1,2,7\*</sup>

<sup>1</sup>The Francis Crick Institute, 1 Midland Road, London, NW11AT, UK

<sup>2</sup>Department of Cell and Developmental Biology, University College London, London, WC1E6DE, UK

<sup>3</sup>Sorbonne Université, Institut de Biologie Paris Seine FR3631, Plateforme de bioinformatique ARTbio, Paris, France.

<sup>4</sup>UCL Great Ormond Street Institute of Child Health, University College London, London, UK

<sup>5</sup>National Institute for Health Research Great Ormond Street Hospital Biomedical Research Centre, London, UK

<sup>6</sup>Centre for Stem Cell Systems, The University of Melbourne, Melbourne, Victoria, Australia.

<sup>7</sup>Dubowitz Neuromuscular Centre, UCL Great Ormond Street Institute of Child Health & Great Ormond Street Hospital for Children, London, UK

#Equally contributing authors

§Current address: Institute of Biomedical Engineering, University of Toronto, Toronto, M5S3E1, Canada

∅Current address: University of Cambridge, Department of Physiology, Development and Neuroscience, Cambridge CB23DY, UK

\*Corresponding author ([f.s.tedesco@ucl.ac.uk](mailto:f.s.tedesco@ucl.ac.uk))

#### Table of Contents

- Appendix Figure S1. Top 50 differentially regulated genes in mMuSC-derived myoblasts, human myoblasts and hiMPs.
- Appendix Figure S2. Cross-comparison of top 50 differentially regulated genes of treated mMuSC-derived myoblasts in human myoblasts and hiMPs.
- Appendix Figure S3. Assessment of differentiation of hiMPs expanded in DMEM/F12-based in-house primary myoblast medium.
- Appendix Figure S4. Assessment of spontaneous differentiation of DLL4 & PDGF-BB treated hiMPs.
- Appendix Table S1. Top 50 genes responsible for variations of PC1 and 2 in the principal component analysis shown in Fig 2A.
- Appendix Table S2. Full list of genes of heatmaps shown in Appendix Fig S1 displaying 50 genes which exhibit either the greatest up- or down-regulation upon treatment with DLL4 & PDGF-BB in mMuSC (left), human myoblasts (centre) and hiMPs (right).
- Appendix Table S3. Table of ranked genes supplementing heatmaps presented in Appendix Fig S2.
- Appendix Table S4. Table of ranked genes accompanying heatmaps “Regulation of cell morphology”, “Proliferation of stem/myogenic cells” and “Leukocyte trans-endothelial migration” (Figures 3A, 3D and 4H, respectively).

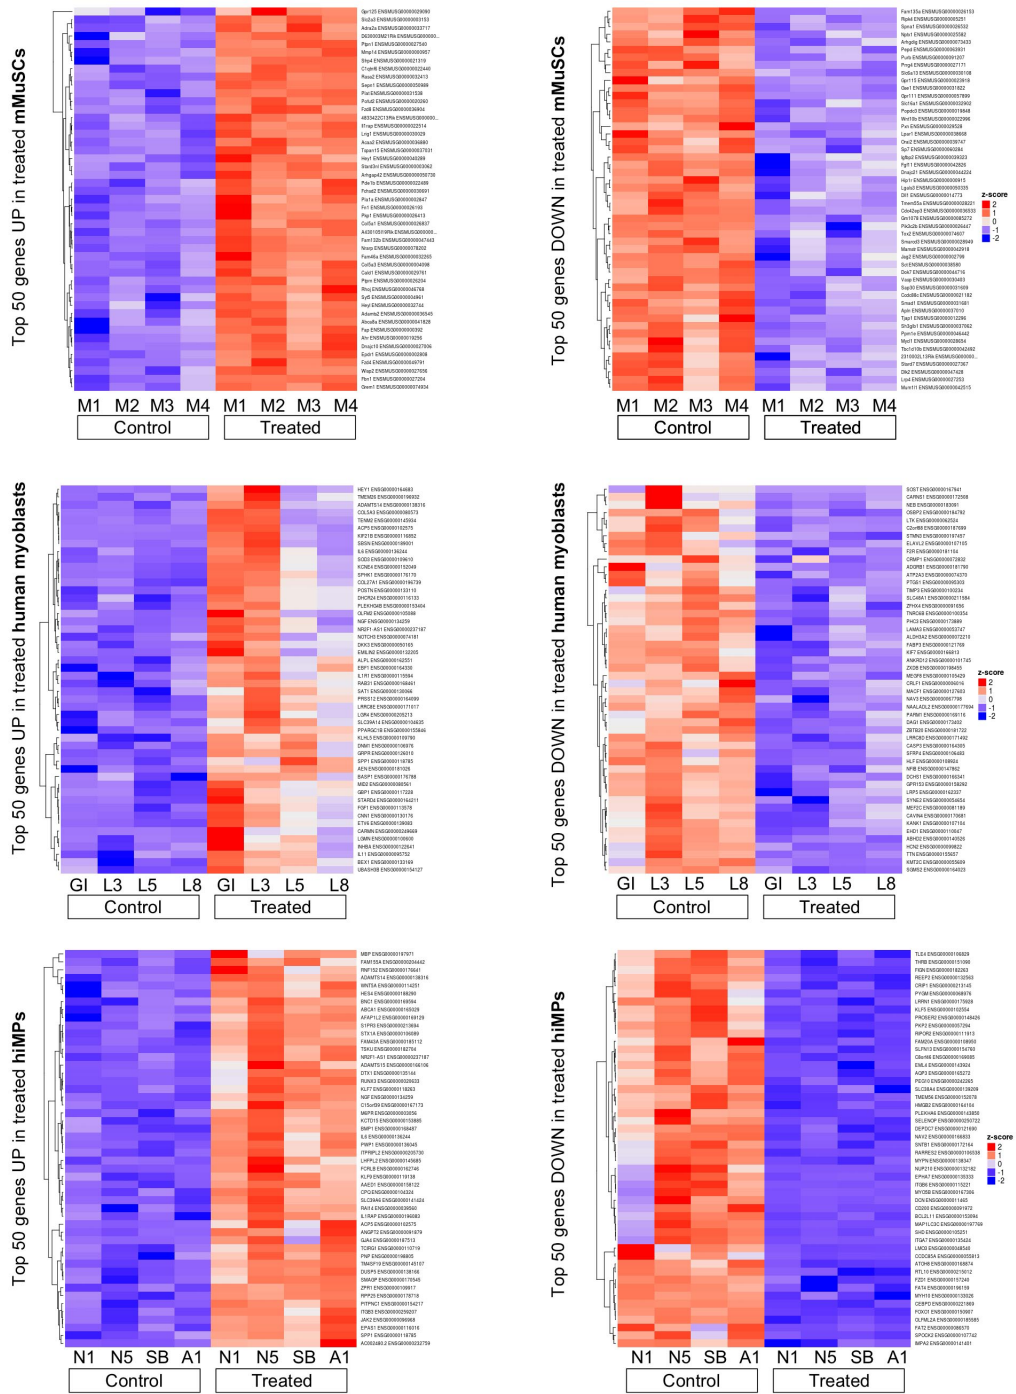

**Appendix Figure S1. Top 50 differentially regulated genes in mMuSC-derived myoblasts, human myoblasts and hiMPs.** Heatmaps displaying 50 genes which exhibit either the greatest up- (left) or down-regulation (right) upon treatment with DLL4 & PDGF-BB in mMuSC (top), human myoblasts (centre) and hiMPs (bottom). Additional information (details on gene list) in Appendix Table S3.

A

Top 50 up-/down-regulated genes of treated mMuSC in human myoblasts

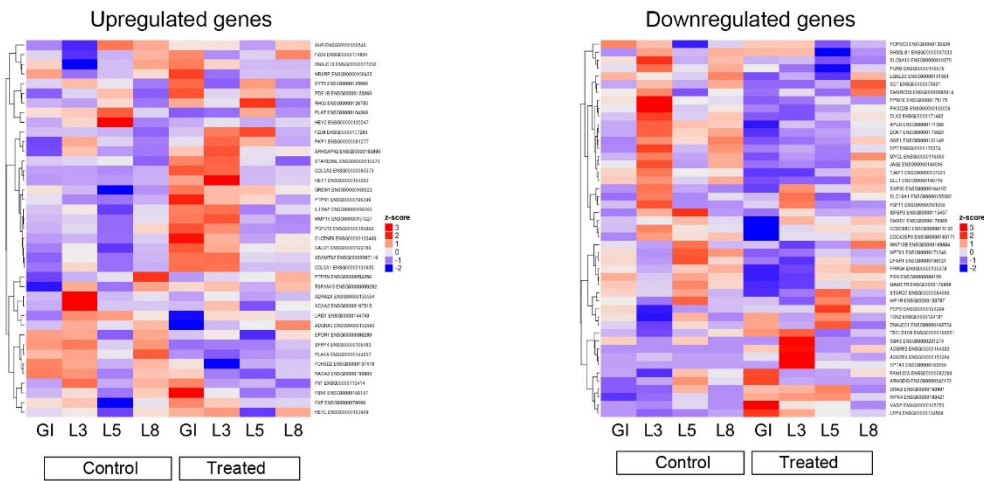

B

Top 50 up-/down-regulated genes of treated mMuSC in hiMPs

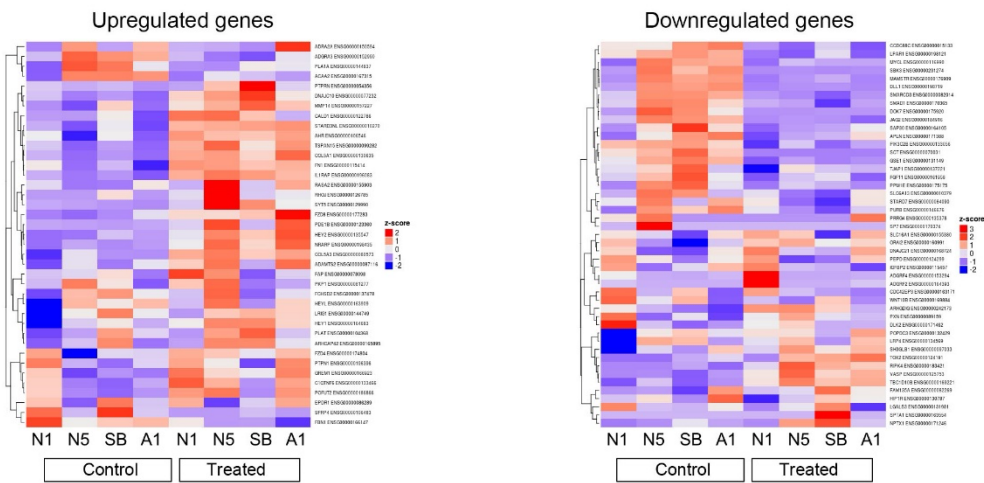

**Appendix Figure S2. Cross-comparison of top 50 differentially regulated genes of treated mMuSC-derived myoblasts in human myoblasts and hiMPs. (A)** Heatmaps of the top 50 up- (left) and down-regulated (right) genes of DLL4 & PDGF-BB-treated mMuSC-derived myoblasts in treated and untreated human myoblasts. **(B)** Heatmaps of the top 50 up- (left) and down-regulated (right) genes of DLL4 & PDGF-BB-treated mMuSC-derived myoblasts in treated and untreated hiMPs.

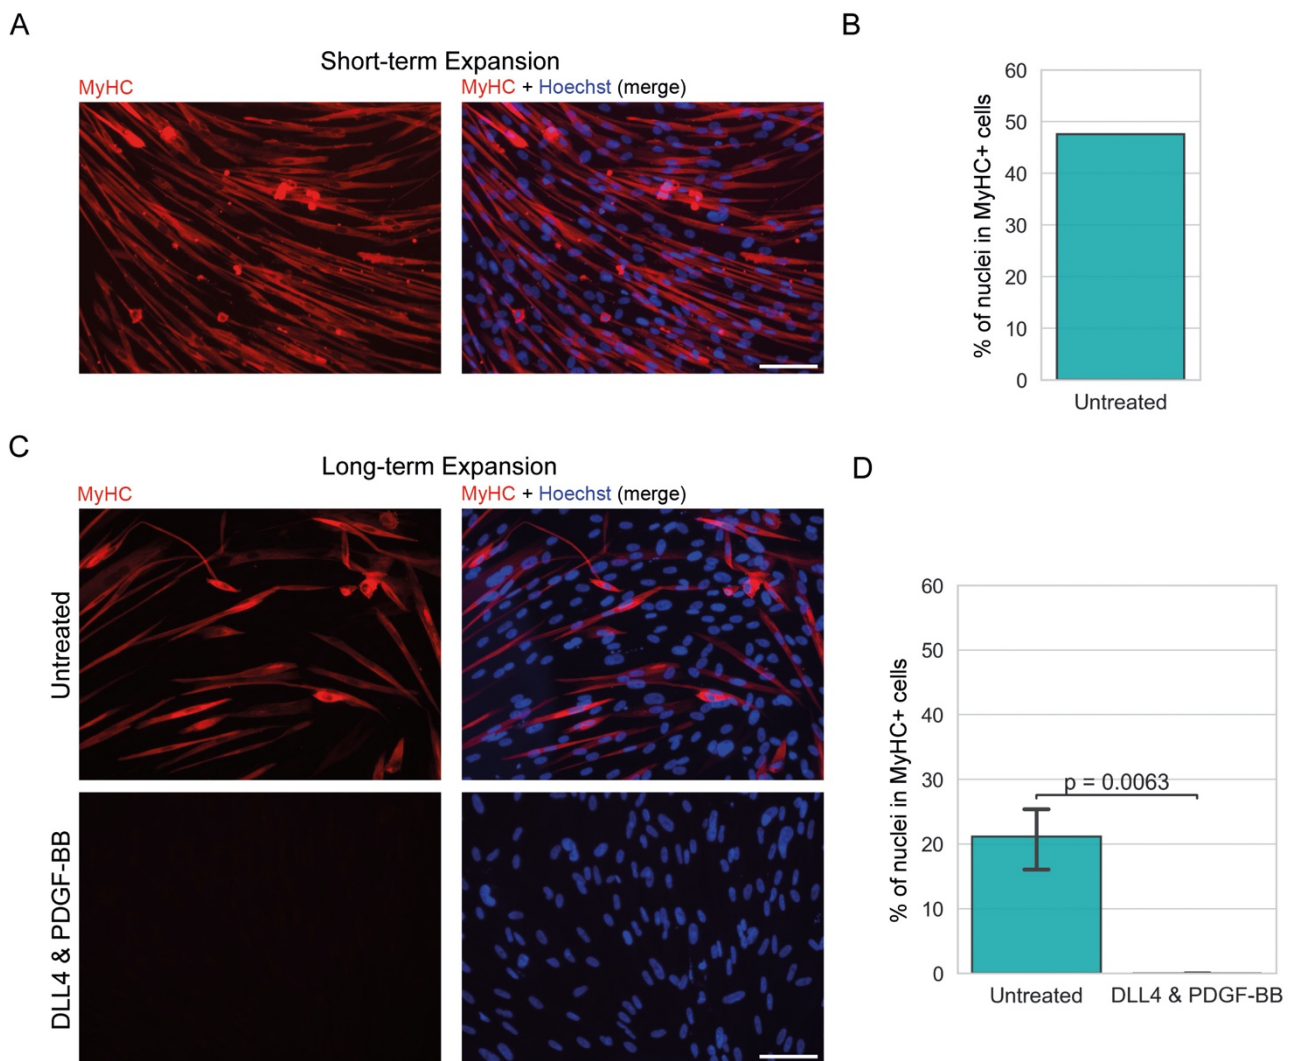

**Appendix Figure S3. Assessment of differentiation of hiMPs expanded in DMEM/F12-based in-house primary myoblast medium.** (A) Representative immunofluorescence images of hiMPs expanded in the in-house primary myoblast medium for 7 days (short term) (technical replicates = 2). Scale bar = 100 $\mu$ m. (B) Bar chart showing the quantification of terminal myogenic differentiation in (A). (C) Immunofluorescence images of hiMPs, 4 days post-differentiation into myotubes after expansion in the primary myoblast medium for longer than 7 days in either untreated or treated conditions. (D) Bar chart displaying the differentiation index for images in (C) (experimental replicates = 3). Scale bar = 100 $\mu$ m.

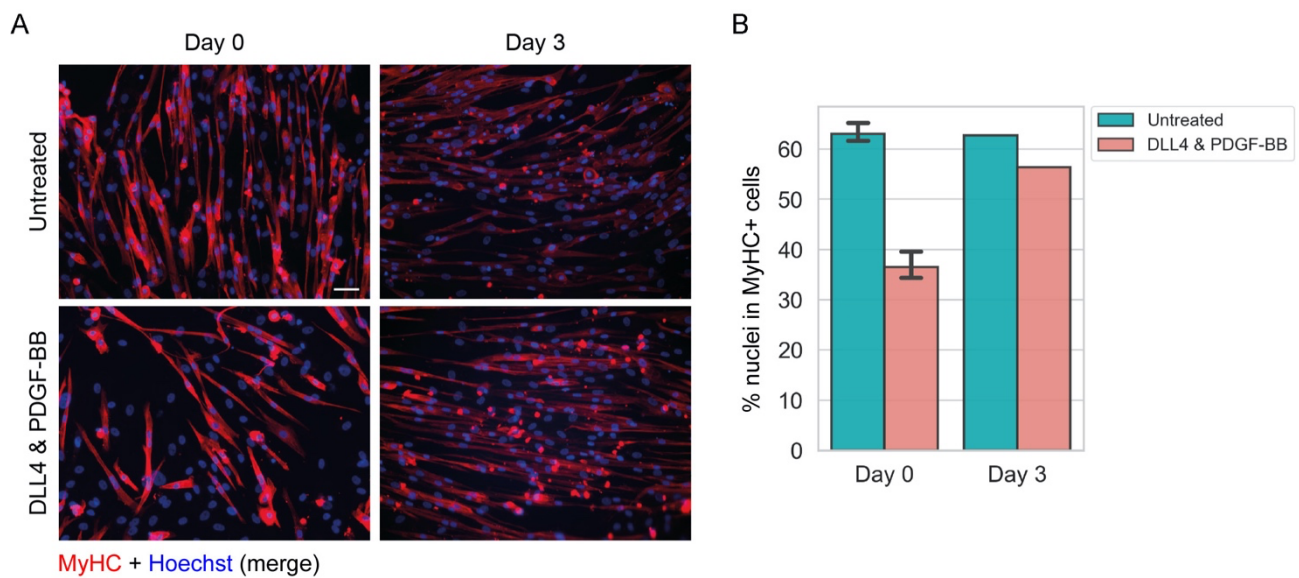

**Appendix Figure S4. Assessment of spontaneous differentiation of DLL4 & PDGF-BB treated hiMPs. (A)** Representative immunofluorescence images of untreated and DLL4 & PDGF-BB-treated hiMPs differentiated into myotubes for 4 days either immediately after 7 days of treatment or after proliferation of uncoated plastic dishes for 3 days. **(B)** Bar graph quantifying the differentiation of images in (A) using the differentiation index (Experimental replicates = 3 for Day 0; Experimental replicates = 1 for Day 3). Scale bar = 50 $\mu$ m.

|    | <b>mMuSCs<br/>PC1 (45%)</b> | <b>mMuSCs<br/>PC2 (35%)</b> | <b>hMBs<br/>PC1(50%)</b> | <b>hMBs<br/>PC2 (25%)</b> | <b>hiMPs<br/>PC1 (63%)</b> | <b>hiMPs<br/>PC2 (17%)</b> |
|----|-----------------------------|-----------------------------|--------------------------|---------------------------|----------------------------|----------------------------|
| 1  | Col15a1                     | Ii33                        | COL5A3                   | XIST                      | TTN                        | EPGN                       |
| 2  | Col6a2                      | Actc1                       | TRH                      | RPS4Y1                    | MYBPH                      | CPA4                       |
| 3  | Col1a1                      | Flt1                        | TTN                      | DDX3Y                     | SYNPO2                     | SFRP1                      |
| 4  | Col6a1                      | Tek                         | SLC14A1                  | USP9Y                     | TNNI1                      | C3                         |
| 5  | Grem1                       | Jag1                        | OLFM2                    | NOS1                      | MYH8                       | UNC5B                      |
| 6  | Pdgfrb                      | Usp43                       | POSTN                    | KDM5D                     | TNNT2                      | SRGN                       |
| 7  | Heyl                        | Cyp2j6                      | ASS1                     | ZFY                       | CHRND                      | GDF6                       |
| 8  | Bgn                         | Myog                        | CRISPLD2                 | MYH3                      | CHRNA1                     | RGS4                       |
| 9  | Adamts2                     | Myo5b                       | ZNF469                   | LINC00261                 | KLHL41                     | OXTR                       |
| 10 | Sfrp4                       | Tnnt1                       | ALDH1A1                  | EIF1AY                    | SHD                        | IL1RL1                     |
| 11 | Col6a3                      | Tnnc2                       | STMN2                    | NLGN4Y                    | XIRP1                      | MSC                        |
| 12 | Col5a3                      | Atp2a1                      | PTGIS                    | ERAP2                     | ACTC1                      | GUCY1A2                    |
| 13 | Lrrc32                      | C1qtnf3                     | KLHL41                   | ELN                       | RYR1                       | HOXB9                      |
| 14 | Cdh11                       | Mylpf                       | MYH3                     | HLA-A                     | ENO3                       | INHBE                      |
| 15 | Nrarp                       | Grb10                       | IGFBP5                   | TXLNGY                    | CDH15                      | ARRDC4                     |
| 16 | Itgb3                       | Nefm                        | INA                      | COL11A1                   | UNC45B                     | TRIB3                      |
| 17 | Thy1                        | Sp7                         | NOTCH3                   | F13A1                     | FNDC5                      | CHRDL1                     |
| 18 | Igfbp7                      | Kihl41                      | SERPINE2                 | STMN2                     | TNNC1                      | DIO2                       |
| 19 | Pkp1                        | Smyd1                       | KCNE4                    | MMP1                      | MYH3                       | ZNF280D                    |
| 20 | Cyp1b1                      | Lepr                        | JAG1                     | EBF2                      | SRL                        | PRKG1                      |
| 21 | Mgp                         | Sema3d                      | LAMA3                    | CLGN                      | DES                        | GPRC5C                     |
| 22 | Serping1                    | Igf2                        | MYBPH                    | TNNI1                     | ACTA1                      | NLGN1                      |
| 23 | Ctgf                        | Meg3                        | NEB                      | UTY                       | SMYD1                      | NPY1R                      |
| 24 | Apbb1ip                     | Podxl                       | TENM2                    | SFRP1                     | MYH7                       | DDIT3                      |
| 25 | Fap                         | Synpo2l                     | NTSR1                    | RARRES2                   | VGLL2                      | CCDC3                      |
| 26 | Pcp4l1                      | Rian                        | TNFRSF1B                 | TNNT2                     | MYO22                      | MSC-AS1                    |
| 27 | Cldn4                       | Zdbf2                       | CD24                     | PLXNA4                    | MYOG                       | ADM2                       |
| 28 | Igfbp2                      | Myh3                        | HSPB7                    | KRT19                     | LMO7                       | DCC                        |
| 29 | Tcerg1l                     | Dchs1                       | TNNT2                    | IGFBP3                    | MYOD1                      | ENPP2                      |
| 30 | Abcb1a                      | Nefl                        | MYLPF                    | COLEC12                   | ACTN2                      | TSPYL5                     |
| 31 | Postn                       | Ldb3                        | INHBA                    | ZNF185                    | SFRP5                      | UNC13A                     |
| 32 | S1pr1                       | Fam84a                      | ADAMTS12                 | PRKY                      | F13A1                      | GATA6                      |
| 33 | Tagln                       | Sfrp4                       | NGFR                     | MYH7                      | CKM                        | LAMC2                      |
| 34 | Fn1                         | Sct                         | KIF21B                   | SIM2                      | NCAM1                      | TYW3                       |
| 35 | Trp53i11                    | Gpnmb                       | MYOD1                    | ANO1                      | MYLPF                      | OLFM2                      |
| 36 | Il6                         | Aqp5                        | SCG2                     | IL17RD                    | STAC3                      | SPON2                      |
| 37 | Itgb5                       | Myl1                        | L1CAM                    | CECR1                     | NEB                        | TUBB                       |
| 38 | Fam132b                     | Mstn                        | CKB                      | MYLPF                     | KLHL31                     | KLF4                       |
| 39 | Pde1b                       | H19                         | F3                       | TTY15                     | ITGA7                      | BAALC                      |
| 40 | Scg2                        | Actn2                       | SFRP1                    | ACTN2                     | ERBB3                      | DPP4                       |
| 41 | Itga1                       | Mybpc1                      | COL4A1                   | ACTA1                     | GATM                       | LURAP1L                    |
| 42 | Cd248                       | Btc                         | MYH7                     | F2RL1                     | MYL4                       | TGM2                       |
| 43 | Cd28                        | Lmod3                       | ADAM12                   | IL13RA2                   | MYPN                       | JRK                        |
| 44 | Slit2                       | Myl4                        | ALDH3A1                  | HOXC10                    | B3GALT2                    | LGR4                       |
| 45 | Pappa                       | Ppfia4                      | ACTC1                    | KIAA1462                  | FGFR4                      | MCTP2                      |
| 46 | Gucy1a2                     | Srl                         | CCDC141                  | MYBPH                     | SHISA9                     | GJB2                       |
| 47 | Stc1                        | Mylk4                       | MYH8                     | CASQ2                     | NNAT                       | CXCL8                      |
| 48 | Klf9                        | Pdlim3                      | COL5A1                   | FLG                       | SORBS1                     | CPE                        |
| 49 | Tnfaip2                     | Nrep                        | ADAMTS2                  | ANKRD1                    | NPY                        | PCDH1                      |
| 50 | Mrc2                        | Acta1                       | MYOG                     | SLIT2                     | COL25A1                    | TBX2                       |

**Appendix Table S1.** Top 50 genes responsible for variations of PC1 and 2 in the principal component analysis shown in Fig 2A.

| 50 top upregulated genes in mMuSCs          | 50 top up genes in human myoblasts                   | 50 top upregulated genes in hiMPs          |
|---------------------------------------------|------------------------------------------------------|--------------------------------------------|
| Gpr125, ENSMUSG00000029090                  | HEY1, ENSG00000164683                                | MBP, ENSG00000197971                       |
| Slc2a3, ENSMUSG00000003153                  | TMEM26, ENSG00000196932                              | FAM155A, ENSG00000204442                   |
| Adra2a, ENSMUSG000000033717                 | <b>ADAMTS14, ENSG00000138316</b>                     | RNF152, ENSG00000176641                    |
| D630003M21Rik, ENSMUSG00000037813           | COL5A3, ENSG00000080573                              | <b>ADAMTS14, ENSG00000138316</b>           |
| Ptprn1, ENSMUSG000000027540                 | TENM2, ENSG00000145934                               | WNT5A, ENSG00000114251                     |
| Mmp14, ENSMUSG00000000957                   | ACP5, ENSG00000102575                                | HES4, ENSG00000188290                      |
| Sfrp4, ENSMUSG000000021319                  | KIF21B, ENSG00000116852                              | BNC1, ENSG00000169594                      |
| C1qtnf6, ENSMUSG00000022440                 | SBSN, ENSG00000189001                                | ABCA1, ENSG00000165029                     |
| Rasa2, ENSMUSG000000032413                  | <b>IL6, ENSG00000136244</b>                          | AFAP1L2, ENSG00000169129                   |
| Seprn1, ENSMUSG000000050989                 | SOD3, ENSG00000109610                                | S1PR3, ENSG00000213694                     |
| Plat, ENSMUSG000000031538                   | KCNE4, ENSG00000152049                               | STX1A, ENSG00000106089                     |
| Pofut2, ENSMUSG00000020260                  | SPHK1, ENSG00000176170                               | FAM43A, ENSG00000185112                    |
| Fzd8, ENSMUSG000000036904                   | COL27A1, ENSG00000196739                             | TSKU, ENSG00000182704                      |
| 4833422C13Rik, ENSMUSG000000074782          | POSTN, ENSG00000133110                               | NR2F1-AS1, ENSG000002037187                |
| Il1rap, ENSMUSG000000022514                 | DHCR24, ENSG00000116133                              | <b>ADAMTS15, ENSG00000166106</b>           |
| Lrig1, ENSMUSG000000030029                  | PLEKHG4B, ENSG00000153404                            | DTX1, ENSG00000135144                      |
| Acaa2, ENSMUSG000000036880                  | OLFM2, ENSG00000105088                               | RUNX3, ENSG00000202633                     |
| Tspan15, ENSMUSG000000037031                | <b>NGF, ENSG00000134259</b>                          | KLf7, ENSG00000118263                      |
| Hey1, ENSMUSG000000040289                   | <b>NR2F1-AS1, ENSG00000237187</b>                    | <b>NGF, ENSG00000134259</b>                |
| Stard3nl, ENSMUSG00000003062                | NOTCH3, ENSG00000074181                              | C15orf39, ENSG00000167173                  |
| Arhgap42, ENSMUSG000000050730               | DKK3, ENSG000000050165                               | M6PR, ENSG00000003056                      |
| Pde1b, ENSMUSG000000022489                  | EMILIN2, ENSG00000132205                             | KCTD15, ENSG00000153885                    |
| Fchs2, ENSMUSG000000030691                  | ALPL, ENSG00000162551                                | BMP1, ENSG00000168487                      |
| Pla1a, ENSMUSG00000002847                   | EBF1, ENSG00000164330                                | <b>IL6, ENSG00000136244</b>                |
| Fn1, ENSMUSG000000026193                    | IL1R1, ENSG00000115594                               | PWP1, ENSG00000136045                      |
| Pkp1, ENSMUSG000000026413                   | RAB31, ENSG00000168461                               | ITPR1L2, ENSG00000205730                   |
| Col5a1, ENSMUSG000000026837                 | SAT1, ENSG00000130066                                | LHFPL2, ENSG00000145685                    |
| A430105I19Rik, ENSMUSG000000045838          | PRSS12, ENSG00000164099                              | FCRLB, ENSG00000162746                     |
| Fam132b, ENSMUSG000000047443                | LRRc8E, ENSG00000171017                              | KLf9, ENSG00000119138                      |
| Nrarp, ENSMUSG000000078202                  | LGR4, ENSG000000205213                               | AAED1, ENSG00000158122                     |
| Fam46a, ENSMUSG000000032265                 | SLC39A14, ENSG00000104635                            | CPQ, ENSG00000104324                       |
| Col5a3, ENSMUSG00000004098                  | PPARGC1B, ENSG00000155846                            | SLC39A6, ENSG00000141424                   |
| Cald1, ENSMUSG000000029761                  | KLHL5, ENSG00000109790                               | RAI14, ENSG00000039560                     |
| Ptprn, ENSMUSG000000026204                  | DNM1, ENSG00000106976                                | IL1RAP, ENSG00000196083                    |
| Rhoj, ENSMUSG000000046768                   | GRPR, ENSG00000126010                                | ACP5, ENSG00000102575                      |
| Syt5, ENSMUSG00000004961                    | <b>SPP1, ENSG00000118785</b>                         | ANGPT2, ENSG00000091879                    |
| Heyl, ENSMUSG000000032744                   | AEN, ENSG00000181026                                 | GJA4, ENSG00000187513                      |
| Adams2, ENSMUSG000000036545                 | BASP1, ENSG00000176788                               | TCIRG1, ENSG00000107179                    |
| Abca8a, ENSMUSG000000041828                 | MID2, ENSG00000080561                                | PNP, ENSG00000198805                       |
| Fap, ENSMUSG00000000392                     | GBP1, ENSG00000117228                                | TM4SF19, ENSG00000145107                   |
| Ahr, ENSMUSG000000019256                    | STARD4, ENSG00000164211                              | DUSP5, ENSG00000138166                     |
| Dnajc10, ENSMUSG000000027006                | FGF1, ENSG00000113578                                | SMAGP, ENSG00000170545                     |
| Epdrl1, ENSMUSG000000002808                 | CNN1, ENSG00000130176                                | ZPR1, ENSG00000109917                      |
| Fzd4, ENSMUSG000000049791                   | ETV6, ENSG00000139083                                | RPP25, ENSG00000178718                     |
| Wisp2, ENSMUSG000000027656                  | CARMN, ENSG00000249669                               | PITPNC1, ENSG00000154217                   |
| Fbn1, ENSMUSG000000027204                   | LGMN, ENSG00000100600                                | ITGB3, ENSG00000259207                     |
| Grem1, ENSMUSG000000074934                  | INHBA, ENSG00000122641                               | JAK2, ENSG00000096968                      |
| *Cfh, ENSMUSG000000026365                   | IL11, ENSG00000009572                                | EPAS1, ENSG00000116016                     |
| *AW011738, ENSMUSG000000078349              | BEX1, ENSG00000133169                                | <b>SPP1, ENSG00000118785</b>               |
| *Hey2, ENSMUSG000000019789                  | UBASH3B, ENSG00000154127                             | AC002480.2, ENSG00000232759                |
| <b>50 top downregulated genes in mMuSCs</b> | <b>50 top downregulated genes in human myoblasts</b> | <b>50 top downregulated genes in hiMPs</b> |
| Fam135a, ENSMUSG000000026153                | SOST, ENSG00000167941                                | TLE4, ENSG00000106829,                     |
| Ripk4, ENSMUSG000000005251                  | CARNS1, ENSG00000172508                              | THRB, ENSG00000151090                      |
| Spna1, ENSMUSG000000026532                  | NEB, ENSG00000183091                                 | FIGN, ENSG00000182263                      |
| Nptx1, ENSMUSG000000025582                  | OSBP2, ENSG00000184792                               | REEP2, ENSG00000132563                     |
| Arhgdig, ENSMUSG000000073433                | LTK, ENSG00000062524                                 | CRIP1, ENSG00000213145                     |
| Pepp, ENSMUSG000000063931                   | C2orf88, ENSG00000187699                             | PYGM, ENSG00000068976                      |
| Purb, ENSMUSG000000091207                   | STMN3, ENSG00000197457                               | LRRN1, ENSG00000175928                     |
| Prrg4, ENSMUSG000000027171                  | ELAVL2, ENSG00000107105                              | KLf5, ENSG00000102554                      |
| Slc6a13, ENSMUSG000000030108                | F2R, ENSG00000181104                                 | PROSER2, ENSG00000148426                   |
| Gpr115, ENSMUSG000000023918                 | CRMP1, ENSG00000072832                               | PKP2, ENSG000000057294                     |
| Gse1, ENSMUSG000000031822                   | ADGRB1, ENSG00000181790                              | RIPOR2, ENSG00000111913                    |
| Gpr111, ENSMUSG000000057899                 | ATP2A3, ENSG00000074370                              | FAM20A, ENSG00000108950                    |
| Slc16a1, ENSMUSG000000032902                | PTGS1, ENSG00000095303                               | SLFN13, ENSG00000154760                    |
| Popdc3, ENSMUSG000000019848                 | TIMP3, ENSG00000100234                               | C8orf46, ENSG00000169085                   |
| Wnt10b, ENSMUSG000000022996                 | SLC48A1, ENSG00000211584                             | EML4, ENSG00000143924                      |
| Pxn, ENSMUSG000000029528                    | ZFX4, ENSG00000091656                                | AQP3, ENSG00000165272                      |
| Lpar1, ENSMUSG000000038668                  | TNRC6B, ENSG00000100354                              | PEG10, ENSG00000242265                     |
| Oral2, ENSMUSG000000039747                  | PHC3, ENSG00000173889                                | SLC38A4, ENSG00000139209                   |
| Sp7, ENSMUSG000000060284                    | LAMA3, ENSG000000053747                              | TMEM56, ENSG00000152078                    |
| Igfbp2, ENSMUSG000000039323                 | ALDH3A2, ENSG00000072210                             | HMG2B, ENSG00000164104                     |
| Fgf11, ENSMUSG000000042826                  | FABP3, ENSG00000121769                               | PLEKH46, ENSG00000143860                   |
| Dnajc21, ENSMUSG000000044224                | KIF7, ENSG00000166813                                | SELENOP, ENSG00000250722                   |
| Hip1r, ENSMUSG000000009915                  | ANKRD12, ENSG00000101745                             | DEPDC7, ENSG00000121690                    |
| Lgals3, ENSMUSG000000050335                 | ZXDB, ENSG00000198455                                | NAV2, ENSG00000166833                      |
| Dll1, ENSMUSG000000014773                   | MEGF8, ENSG00000105429                               | SNTB1, ENSG00000172164                     |
| Tmem55a, ENSMUSG000000028221                | CRLF1, ENSG00000008061                               | RARRES2, ENSG00000106538                   |
| Cdc42ep3, ENSMUSG000000036533               | MACF1, ENSG00000127603                               | MYPN, ENSG00000138347                      |
| Gm1078, ENSMUSG000000085272                 | NAV3, ENSG00000067798                                | NUP210, ENSG00000132182                    |
| Pik3c2b, ENSMUSG000000026447                | NAALADL2, ENSG00000177694                            | EPHA7, ENSG00000135333                     |
| Tox2, ENSMUSG000000074607                   | PARM1, ENSG00000169116                               | ITGB6, ENSG00000115221                     |
| Smardc3, ENSMUSG000000028949                | DAG1, ENSG00000173402                                | MYO5B, ENSG00000167306                     |
| Mamstr, ENSMUSG000000042918                 | ZBTB20, ENSG00000181722                              | DCN, ENSG00000114665                       |
| Jag2, ENSMUSG000000002799                   | LRRc8D, ENSG00000171492                              | CD200, ENSG00000091972                     |
| Sct, ENSMUSG000000038580                    | CASP3, ENSG00000164305                               | BCL2L11, ENSG00000153094                   |
| Dok7, ENSMUSG000000044716                   | SFRP4, ENSG00000106483                               | MAP1LC3C, ENSG00000197769                  |
| Vasp, ENSMUSG000000030403                   | HLF, ENSG00000108924                                 | SHD, ENSG00000105251                       |
| Sap30, ENSMUSG000000031609                  | NFIB, ENSG00000147862                                | ITGA7, ENSG00000135424                     |
| Ccdc88c, ENSMUSG000000021182                | DCHS1, ENSG00000166341                               | LMO3, ENSG00000048540                      |
| Smad1, ENSMUSG000000031681                  | GPR153, ENSG00000158292                              | CCDC85A, ENSG00000055813                   |
| Apln, ENSMUSG000000037010                   | LRP5, ENSG00000162337                                | ATOH8, ENSG00000168874                     |
| Tjap1, ENSMUSG000000012296                  | SYNE2, ENSG000000054654                              | RTL10, ENSG00000215012                     |
| Sh3glb1, ENSMUSG000000037062                | MEF2C, ENSG00000081189                               | FZD1, ENSG00000157240                      |
| Ppm1e, ENSMUSG000000046442                  | CAVIN4, ENSG00000170681                              | FAT4, ENSG00000196159                      |
| Myc11, ENSMUSG000000028654                  | KANK1, ENSG00000107104                               | MYH10, ENSG00000133026                     |
| Tbc1d10b, ENSMUSG000000042492               | EHD1, ENSG00000110047                                | CEBPD, ENSG00000221869                     |
| 2310002L13Rik, ENSMUSG000000024512          | ABHD2, ENSG00000140526                               | FOXO1, ENSG00000150907                     |
| Stard7, ENSMUSG000000027367                 | HCN2, ENSG00000099822                                | OLFML2A, ENSG00000185585                   |
| Dlk2, ENSMUSG000000047428                   | TTN, ENSG00000155657                                 | FAT2, ENSG00000086570                      |
| Lrp4, ENSMUSG000000027253                   | KMT2C, ENSG000000055609                              | SPOCK2, ENSG00000107742                    |
| Mum11, ENSMUSG000000042515                  | SGMS2, ENSG00000164023                               | IMPA2, ENSG00000141401                     |

**Appendix Table S2.** Full list of genes of heatmaps shown in Appendix Fig S1 displaying 50 genes which exhibit either the greatest up- or down-regulation upon treatment with DLL4 & PDGF-BB in mMuSC (left), human myoblasts (centre) and hiMPs (right). \*Genes not shown in heatmap due to N/A rows resulting from Stemformatics analysis. Bold font: common genes in human lists.

| Ranked genes                                                 |                 |                                                                |                 |                                                    |                 |                                                      |                 |
|--------------------------------------------------------------|-----------------|----------------------------------------------------------------|-----------------|----------------------------------------------------|-----------------|------------------------------------------------------|-----------------|
| Top 50 upregulated genes of treated mMuSC in human myoblasts |                 | Top 50 downregulated genes of treated mMuSC in human myoblasts |                 | Top 50 upregulated genes of treated mMuSC in hiMPs |                 | Top 50 downregulated genes of treated mMuSC in hiMPs |                 |
| Gene                                                         | Probe           | Gene                                                           | Probe           | Gene                                               | Probe           | Gene                                                 | Probe           |
| AHR                                                          | ENSG00000106546 | POPDC3                                                         | ENSG00000132429 | ADRA2A                                             | ENSG00000150594 | CCDC88C                                              | ENSG00000015133 |
| FZD4                                                         | ENSG00000174804 | SH3GLB1                                                        | ENSG00000097033 | ADGRA3                                             | ENSG00000152990 | LPAR1                                                | ENSG00000198121 |
| DNAJC10                                                      | ENSG00000077232 | SLC6A13                                                        | ENSG00000010379 | PLA1A                                              | ENSG00000144837 | MYCL                                                 | ENSG00000116990 |
| NRARP                                                        | ENSG00000198435 | PURB                                                           | ENSG00000146676 | ACAA2                                              | ENSG00000167315 | SBK3                                                 | ENSG00000231274 |
| SYT5                                                         | ENSG00000129990 | LGALS3                                                         | ENSG00000131981 | PTPRN                                              | ENSG00000054356 | MAMSTR                                               | ENSG00000176909 |
| PDE1B                                                        | ENSG00000123360 | SCT                                                            | ENSG00000070031 | DNAJC10                                            | ENSG00000077232 | DLL1                                                 | ENSG00000198719 |
| RHOJ                                                         | ENSG00000126785 | SMARCD3                                                        | ENSG00000082014 | MMP14                                              | ENSG00000157227 | SMARCD3                                              | ENSG00000082014 |
| PLAT                                                         | ENSG00000104368 | PPM1E                                                          | ENSG00000175175 | CALD1                                              | ENSG00000122786 | SMAD1                                                | ENSG00000170365 |
| HEY2                                                         | ENSG00000135547 | PIK3C2B                                                        | ENSG00000133056 | STAR3NL                                            | ENSG0000010270  | DOK7                                                 | ENSG00000175920 |
| FZD8                                                         | ENSG00000177283 | DLK2                                                           | ENSG00000171462 | AHR                                                | ENSG00000106546 | JAG2                                                 | ENSG00000184916 |
| PKP1                                                         | ENSG00000081277 | APLN                                                           | ENSG00000171388 | TSPAN15                                            | ENSG00000099282 | SAP30                                                | ENSG00000164105 |
| ARHGAP42                                                     | ENSG00000165895 | DOK7                                                           | ENSG00000175920 | COL5A1                                             | ENSG00000130635 | APLN                                                 | ENSG00000171388 |
| STAR3NL                                                      | ENSG0000010270  | GSE1                                                           | ENSG00000131149 | FN1                                                | ENSG00000115414 | PIK3C2B                                              | ENSG00000133056 |
| COL5A3                                                       | ENSG00000080573 | SP7                                                            | ENSG00000170374 | IL1RAP                                             | ENSG00000196083 | SCT                                                  | ENSG00000070031 |
| HEY1                                                         | ENSG00000164683 | MYCL                                                           | ENSG00000116990 | RASA2                                              | ENSG00000155903 | GSE1                                                 | ENSG00000131149 |
| GREM1                                                        | ENSG00000166923 | JAG2                                                           | ENSG00000184916 | RHOJ                                               | ENSG00000126785 | TJAP1                                                | ENSG00000137221 |
| PTPN1                                                        | ENSG00000196396 | TJAP1                                                          | ENSG00000137221 | SYT5                                               | ENSG00000129990 | FGF11                                                | ENSG00000161958 |
| IL1RAP                                                       | ENSG00000196083 | DLL1                                                           | ENSG00000198719 | FZD8                                               | ENSG00000177283 | PPM1E                                                | ENSG00000175175 |
| MMP14                                                        | ENSG00000157227 | SAP30                                                          | ENSG00000164105 | PDE1B                                              | ENSG00000123360 | SLC6A13                                              | ENSG00000010379 |
| POFUT2                                                       | ENSG00000186866 | SLC16A1                                                        | ENSG00000155380 | HEY2                                               | ENSG00000135547 | STAR3NL                                              | ENSG0000010270  |
| C1QTNF6                                                      | ENSG00000133466 | FGF11                                                          | ENSG00000161958 | NRARP                                              | ENSG00000198435 | PURB                                                 | ENSG00000146676 |
| CALD1                                                        | ENSG00000122786 | IGFBP2                                                         | ENSG00000115457 | COL5A3                                             | ENSG00000080573 | PRRG4                                                | ENSG00000135378 |
| ADAMTS2                                                      | ENSG00000087116 | SMAD1                                                          | ENSG00000170365 | ADAMTS2                                            | ENSG00000087116 | SP7                                                  | ENSG00000170374 |
| COL5A1                                                       | ENSG00000130635 | CCDC88C                                                        | ENSG00000015133 | FAP                                                | ENSG00000078098 | SLC16A1                                              | ENSG00000155380 |
| PTPRN                                                        | ENSG00000054356 | CDC42EP3                                                       | ENSG00000163171 | PKP1                                               | ENSG00000081277 | Orai2                                                | ENSG00000160991 |
| TSPAN15                                                      | ENSG00000099282 | WNT10B                                                         | ENSG00000169884 | FCHSD2                                             | ENSG00000137478 | DNAJC21                                              | ENSG00000168724 |
| ADRA2A                                                       | ENSG00000150594 | NPTX1                                                          | ENSG00000171246 | HEYL                                               | ENSG00000163909 | PEPD                                                 | ENSG00000124299 |
| ACAA2                                                        | ENSG00000167315 | LPAR1                                                          | ENSG00000198121 | LRIG1                                              | ENSG00000144749 | IGFBP2                                               | ENSG00000115457 |
| LRIG1                                                        | ENSG00000144749 | PRRG4                                                          | ENSG00000135378 | HEY1                                               | ENSG00000164683 | ADGRF4                                               | ENSG00000153294 |
| ADGRA3                                                       | ENSG00000152990 | PXN                                                            | ENSG00000089159 | PLAT                                               | ENSG00000104368 | ADGRF2                                               | ENSG00000164393 |
| EPDR1                                                        | ENSG00000086289 | MAMSTR                                                         | ENSG00000176909 | ARHGAP42                                           | ENSG00000165895 | CDC42EP3                                             | ENSG00000163171 |
| SFRP4                                                        | ENSG00000106483 | STAR3NL                                                        | ENSG0000010270  | FZD4                                               | ENSG00000174804 | WNT10B                                               | ENSG00000169884 |
| PLA1A                                                        | ENSG00000144837 | HIP1R                                                          | ENSG00000130787 | PTPN1                                              | ENSG00000196396 | ARHGADIG                                             | ENSG00000242173 |
| FCHSD2                                                       | ENSG00000137478 | PEPD                                                           | ENSG00000124299 | GREM1                                              | ENSG00000166923 | PXN                                                  | ENSG00000089159 |
| RASA2                                                        | ENSG00000155903 | TOX2                                                           | ENSG00000124191 | C1QTNF6                                            | ENSG00000133466 | DLK2                                                 | ENSG00000171462 |
| FN1                                                          | ENSG00000115414 | DNAJC21                                                        | ENSG00000168724 | POFUT2                                             | ENSG00000186866 | POPDC3                                               | ENSG00000132429 |
| FBN1                                                         | ENSG00000166147 | TBC1D10B                                                       | ENSG00000169221 | EPDR1                                              | ENSG00000086289 | LRP4                                                 | ENSG00000134569 |
| FAP                                                          | ENSG00000078098 | SBK3                                                           | ENSG00000231274 | SFRP4                                              | ENSG00000106483 | SH3GLB1                                              | ENSG00000097033 |
| HEYL                                                         | ENSG00000163909 | ADGRF2                                                         | ENSG00000164393 | FBN1                                               | ENSG00000166147 | TOX2                                                 | ENSG00000124191 |
| Fam132b                                                      | *               | ADGRF4                                                         | ENSG00000153294 | Fam132b                                            | *               | RIPK4                                                | ENSG00000183421 |
| 4833422C13Rik                                                | *               | SPTA1                                                          | ENSG00000163554 | 4833422C13Rik                                      | *               | VASP                                                 | ENSG00000125753 |
| Wisp2                                                        | *               | FAM135A                                                        | ENSG00000082269 | Wisp2                                              | *               | TBC1D10B                                             | ENSG00000169221 |
| A430105119Rik                                                | *               | ARHGADIG                                                       | ENSG00000242173 | A430105119Rik                                      | *               | FAM135A                                              | ENSG00000082269 |
| Slc2a3                                                       | *               | Orai2                                                          | ENSG00000160991 | Slc2a3                                             | *               | HIP1R                                                | ENSG00000130787 |
| Abca8a                                                       | *               | RIPK4                                                          | ENSG00000183421 | Abca8a                                             | *               | LGALS3                                               | ENSG00000131981 |
| Cfh                                                          | *               | VASP                                                           | ENSG00000125753 | Cfh                                                | *               | SPTA1                                                | ENSG00000163554 |
| Fam46a                                                       | *               | LRP4                                                           | ENSG00000134569 | Fam46a                                             | *               | NPTX1                                                | ENSG00000171246 |
| Sepn1                                                        | *               | Tmem55a                                                        | *               | Sepn1                                              | *               | Tmem55a                                              | *               |
| AW011738                                                     | *               | Mum11                                                          | *               | AW011738                                           | *               | Mum11                                                | *               |
| D630003M21Rik                                                | *               | Dynap                                                          | *               | D630003M21Rik                                      | *               | Dynap                                                | *               |

**Appendix Table S3.** Table of ranked genes supplementing heatmaps presented in Appendix Fig S2: “Top 50 upregulated genes of treated mMuSC-derived myoblasts in human myoblasts” (Appendix Fig S2A) (left); “Top 50 downregulated genes of treated mMuSC-derived myoblasts in human myoblasts” (Appendix Fig S2A) (right); “Top 50 upregulated genes of treated mMuSC-derived myoblasts in hiMPs” (Appendix Fig S2B) (left); “Top 50 downregulated genes of treated mMuSC-derived myoblasts in hiMPs” (Appendix Fig S2B) (right). \*no human orthologue found.



| Ranked genes                  |                 |                                      |                 |                                       |                 |
|-------------------------------|-----------------|--------------------------------------|-----------------|---------------------------------------|-----------------|
| Regulation of cell morphology |                 | Proliferation of stem/myogenic Cells |                 | Leukocyte trans-endothelial migration |                 |
| Gene                          | Probe           | Gene                                 | Probe           | Gene                                  | Probe           |
| MYO10                         | ENSG00000145555 | MMP9                                 | ENSG00000100985 | TXK                                   | ENSG00000074966 |
| VEGFA                         | ENSG00000112715 | PTGIR                                | ENSG00000160013 | ACTN3                                 | ENSG00000248746 |
| RHOQ                          | ENSG00000119729 | VEGFA                                | ENSG00000112715 | VAV3                                  | ENSG00000134215 |
| FN1                           | ENSG00000115414 | PDGFRB                               | ENSG00000113721 | CLDN5                                 | ENSG00000184113 |
| KIT                           | ENSG00000157404 | NGF                                  | ENSG00000134259 | ITGB2                                 | ENSG00000160255 |
| RAC3                          | ENSG00000169750 | IRAK1                                | ENSG00000184216 | RASSF5                                | ENSG00000266094 |
| WIPF1                         | ENSG00000115935 | TGFB1                                | ENSG00000105329 | ACTN2                                 | ENSG00000077522 |
| SH3KBP1                       | ENSG00000147010 | C3AR1                                | ENSG00000171860 | JAM2                                  | ENSG00000154721 |
| RHOC                          | ENSG00000155366 | KITLG                                | ENSG00000049130 | PIK3R1                                | ENSG00000145675 |
| HEXB                          | ENSG00000049860 | GNAI3                                | ENSG00000065135 | JAM3                                  | ENSG00000166086 |
| CDC42EP4                      | ENSG00000179604 | SIRT6                                | ENSG00000077463 | MYLPF                                 | ENSG00000180209 |
| RAC1                          | ENSG00000136238 | JAK2                                 | ENSG00000096968 | CTNNA3                                | ENSG00000183230 |
| MSN                           | ENSG00000147065 | ITGB3                                | ENSG00000259207 | GNAI1                                 | ENSG00000127955 |
| PLXND1                        | ENSG00000004399 | SNAI2                                | ENSG00000019549 | CXCL12                                | ENSG00000107562 |
| IL6                           | ENSG00000136244 | IL6                                  | ENSG00000136244 | MYL2                                  | ENSG00000111245 |
| FMNL3                         | ENSG00000161791 | NOTCH3                               | ENSG00000074181 | MMP9                                  | ENSG00000100985 |
| MYH9                          | ENSG00000100345 | MYC                                  | ENSG00000136997 | PLCG2                                 | ENSG00000197943 |
| KIF3A                         | ENSG00000131437 | NOS3                                 | ENSG00000164867 | CLDN7                                 | ENSG00000181885 |
| FBLIM1                        | ENSG00000162458 | ILK                                  | ENSG00000166333 | ESAM                                  | ENSG00000149564 |
| CDC42EP1                      | ENSG00000128283 | TRIB1                                | ENSG00000173334 | ARHGAP35                              | ENSG00000160007 |
| DLC1                          | ENSG00000164741 | IL12A                                | ENSG00000168811 | RHOH                                  | ENSG00000168421 |
| ARHGAP35                      | ENSG00000160007 | HBEGF                                | ENSG00000113070 | ACTN1                                 | ENSG00000072110 |
| ARAP3                         | ENSG00000120318 | CAV1                                 | ENSG00000105974 | ITGB1                                 | ENSG00000150093 |
| RHOG                          | ENSG00000177105 | CNN1                                 | ENSG00000130176 | VASP                                  | ENSG00000125753 |
| RHOD                          | ENSG00000173156 | FGF9                                 | ENSG00000102678 | THY1                                  | ENSG00000154096 |
| SEMA4D                        | ENSG00000187764 | BMPR1A                               | ENSG00000107779 | RAP1B                                 | ENSG00000127314 |
| LPAR1                         | ENSG00000198121 | HMGB2                                | ENSG00000164104 | RAC1                                  | ENSG00000136238 |
| MYH10                         | ENSG00000133026 | BMP4                                 | ENSG00000125378 | GNAI3                                 | ENSG00000065135 |
| RHOBTB3                       | ENSG00000164292 | RBPJ                                 | ENSG00000168214 | MSN                                   | ENSG00000147065 |
| PHIP                          | ENSG00000146247 | CTNNBIP1                             | ENSG00000178585 |                                       |                 |
| S100A13                       | ENSG00000189171 | SOX15                                | ENSG00000129194 |                                       |                 |
| PALMD                         | ENSG00000099260 | MYOD1                                | ENSG00000129152 |                                       |                 |
| ITGA7                         | ENSG00000135424 | MAP3K5                               | ENSG00000197442 |                                       |                 |
| PALM2                         | ENSG00000243444 | PIK3R1                               | ENSG00000145675 |                                       |                 |
| EPB41L3                       | ENSG00000082397 | MYOG                                 | ENSG00000122180 |                                       |                 |
| WIPF3                         | ENSG00000122574 | KLHL41                               | ENSG00000239474 |                                       |                 |
| SEMA3E                        | ENSG00000170381 | SMARCD3                              | ENSG00000082014 |                                       |                 |
| KDR                           | ENSG00000128052 | MAGI1                                | ENSG00000151276 |                                       |                 |
| PLXNB1                        | ENSG00000164050 | CAMK2D                               | ENSG00000145349 |                                       |                 |
|                               |                 | MEF2C                                | ENSG00000081189 |                                       |                 |
|                               |                 | MEGF10                               | ENSG00000145794 |                                       |                 |
|                               |                 | PPARGC1A                             | ENSG00000109819 |                                       |                 |
|                               |                 | PDE1A                                | ENSG00000115252 |                                       |                 |
|                               |                 | ANGPT1                               | ENSG00000154188 |                                       |                 |
|                               |                 | MMP2                                 | ENSG00000087245 |                                       |                 |
|                               |                 | RGSS5                                | ENSG00000143248 |                                       |                 |
|                               |                 | IL18                                 | ENSG00000150782 |                                       |                 |
|                               |                 | PDGFD                                | ENSG00000170962 |                                       |                 |
|                               |                 | AKR1B1                               | ENSG00000085662 |                                       |                 |
|                               |                 | MNAT1                                | ENSG00000020426 |                                       |                 |
|                               |                 | SKP2                                 | ENSG00000145604 |                                       |                 |
|                               |                 | EGR1                                 | ENSG00000120738 |                                       |                 |
|                               |                 | TGM2                                 | ENSG00000198959 |                                       |                 |
|                               |                 | DNMT1                                | ENSG00000130816 |                                       |                 |
|                               |                 | ASPM                                 | ENSG00000066279 |                                       |                 |
|                               |                 | ORC1                                 | ENSG00000085840 |                                       |                 |

**Appendix Table S4.** Table of ranked genes accompanying heatmaps “Regulation of cell morphology”, “Proliferation of stem/myogenic cells” and “Leukocyte trans-endothelial migration” (Fig 3A, 3D and 4H, respectively).
